# Supplementary material for: Extracellular vesicles in diabetes mellitus induce alterations in endothelial cell morphology and migration
Source: Springer Nature journal article supplement (doi:10.1186/s12967-020-02398-6), 2020-06-09
Supplement: MOESM1 [file 18066192]

**Additional file 1: Fig. S1**

**Extracellular vesicles in diabetes mellitus induce alterations in endothelial cell morphology and migration**

Sharon F. Wu, Nicole Noren Hooten, David W. Freeman, Nicolle A. Mode, Alan B. Zonderman, and Michele K. Evans

## **Additional methods**

### **Quantification of cell area**

Borders of the cells were traced using ImageJ and the areas were measured in arbitrary units. Only cells that had less than one cell border were counted. Approximately 90 cells were counted for each experiment and the average areas of the three different experiments were calculated (Fig. S1).

**Fig. S1**

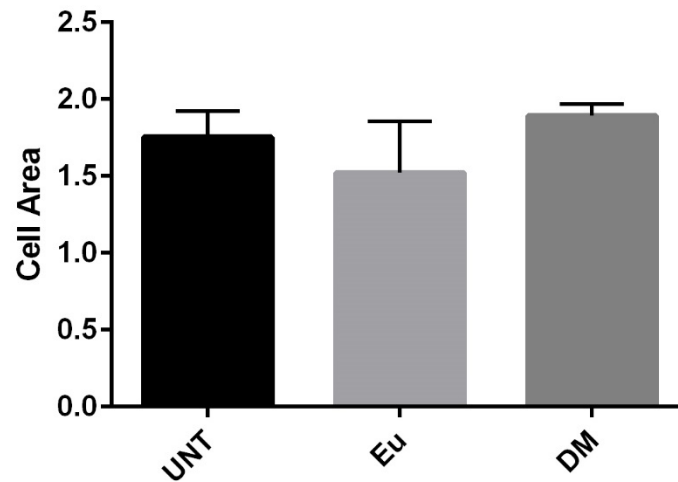

**Fig. S1 Cell area of endothelial cells treated with EVs from euglycemic or diabetic individuals.** Endothelial cells that were either untreated (UNT) or treated with medium-sized EVs from euglycemic or diabetic individuals showed similar cell areas in the immunofluorescence experiments. The histogram represents the average area of cells from three replicate experiments  $\pm$  SEM. No statistically significant differences between the categories were found from comparisons using one-way ANOVA and Tukey's post-hoc test.
